# Supplementary material
Source: PubMed Central journal article supplement (PMC10069441)
Supplement: NIHMS1879628-supplement-Supplemental_Methods.pdf [file NIHMS1879628-supplement-Supplemental_Methods.pdf]

## SUPPLEMENTAL METHODS

### Materials and Methods

Fmoc amino acids were purchased from Chem-Impex and Novabiochem, coupling reagents were purchased from GL Biochem, and solvents and other reagents were purchased from Merck and used without further purification. Resins were purchased from Chem-Impex and sulfonated Cy5 carboxylic acid was purchased from Lumiprobe.

Preparative high-performance liquid chromatography (HPLC) was performed on an Agilent 1260 Prep HPLC system, employing a G1315D photodiode array detector and a Phenomenex Axia Luna C8 column (250 × 21.2 mm, 5 μm), with a flow rate of 10 mL/min. Analytical HPLC was performed on (i) a Waters Alliance 2690 fitted with a Waters 5996 PDA detector and a Phenomenex Luna C<sub>8</sub> column (150 × 4.60 mm, 5 μm), with a flow rate of 1 mL/min and a gradient from 5–100% MeCN in H<sub>2</sub>O (with 0.1% TFA throughout) over 10 min (method A), or (ii) on an Agilent 1260 HPLC system equipped with a G1312B photodiode array detector and an Agilent Eclipse Plus C18 column (100 × 4.6 mm, 3.5 μm), with a flow rate of 1 mL/min and a gradient from 5–100% MeCN in H<sub>2</sub>O (with 0.1% TFA throughout) over 10 min (method B). Liquid chromatography-mass spectrometry (LC-MS) was carried out using an Agilent 6100 Series Single Quad LC-MS coupled to an Agilent 1200 Series HPLC. High-resolution mass spectrometry (HRMS) was carried on a Waters LCT TOF LC-MS mass spectrometer coupled to a 2795 Alliance Separations module.

### Synthesis of Cy5-PK-DPP

To a solution of diphenyl benzyloxycarbonylamino-(4-phthalimidobutyl)methanephosphonate (500 mg, 0.849 mmol) in MeOH (5 mL) was added 10% Pd/C (45 mg, 0.42 mmol) and the resulting suspension stirred for 2 h under an atmosphere of H<sub>2</sub>. The suspension was filtered through celite and reduced *in vacuo*. The resulting solid was then dissolved in dry MeCN (10 mL), and added to a solution of Cbz-Pro-OH (708 mg, 2.84 mmol), HOBt (378 mg, 2.84 mmol), EDCI (538 mg, 2.84) and Et<sub>3</sub>N (1.87 mL, 5.0 mmol) in dry MeCN (10 mL). After stirring for 15 h, the solvent was

removed *in vacuo* and the residue dissolved in Et<sub>2</sub>O (50 mL), washed successively with H<sub>2</sub>O (2 × 50 mL), 0.5 M HCl (2 × 50 mL), saturated NaHCO<sub>3</sub> solution (2 × 50 mL), H<sub>2</sub>O (50 mL) and brine (50 mL), and then dried over MgSO<sub>4</sub>. The resulting crude was purified by silica gel chromatography (60% EtOAc in petroleum spirits) to provide diphenyl Cbz-Pro-(4-phthalimidobutyl)methanephosphonate (300 mg, 43%) as a white solid. LC-MS: *m/z* 696.4 [M+H]<sup>+</sup>. To a solution of diphenyl Cbz-Pro-(4-phthalimidobutyl)methanephosphonate (30 mg, 43 μmol) in MeOH (2 mL) was added 10% Pd/C (5 mg, 5 μmol). This solution was stirred under an atmosphere of H<sub>2</sub> for 6 h. The solution was filtered through a syringe filter (0.22 μm), reduced *in vacuo* to provide diphenyl Pro-(4-phthalimidobutyl)methanephosphonate (10 mg, 41%) as a colorless oil. LC-MS: *m/z* 562.3 [M+H]<sup>+</sup>. To a solution of diphenyl Pro-(4-phthalimidobutyl)methanephosphonate (3 mg, 5 μmol) in dry MeCN (2 mL) was added sulfonated Cy5 carboxylic acid (3 mg, 5 μmol), HCTU (4 mg, 10 μmol) and Et<sub>3</sub>N (3 μL, 20 μmol). After stirring overnight, the crude reaction mixture was purified by preparative HPLC (0–60% MeCN in H<sub>2</sub>O with 0.1% TFA throughout) and the eluate fractions containing diphenyl Cy5-Pro-(4-phthalimidobutyl)methanephosphonate combined. These combined fractions were made basic by dropwise addition of 30% hydrazine solution and stirred at room temperature for 15 h. The resulting solution was acidified to pH 3 with 1 M HCl and purified by preparative HPLC (0–42% MeCN in H<sub>2</sub>O with 0.1% TFA throughout) to provide Cy5-PK-DPP (1.2 mg, 21%) as a blue solid after lyophilization. HRMS: *m/z* calc'd for [M]<sup>+</sup>, M = C<sub>55</sub>H<sub>69</sub>N<sub>5</sub>O<sub>11</sub>PS<sub>2</sub>: 1070.4167, found: 1070.4151. Analytical HPLC (method A): retention time 8.82 min, purity > 95%.

### **Synthesis of Cy5-V-DPP**

A solution of isobutylaldehyde (200 mg, 2.78 mmol), benzylcarbamate (420 mg, 2.78 mmol) and triphenylphosphite (860 mg, 2.78 mmol) in glacial AcOH (10 mL) was heated at 100°C for 2 h. Solvent was removed *in vacuo*, the residue partitioned between H<sub>2</sub>O (50 mL) and Et<sub>2</sub>O (50 mL), made basic by the addition of a saturated aqueous solution of NaHCO<sub>3</sub> and then extracted with further washings of Et<sub>2</sub>O (2 × 50 mL). The combined organic washings

were dried over  $\text{MgSO}_4$  and purified by silica gel chromatography (0–20% EtOAc in petroleum spirits) to provide diphenyl benzyloxycarbonylaminoisopropylmethanephosphonate (796 mg, 65%). LC-MS:  $m/z$  440.3  $[\text{M}+\text{H}]^+$ . To a solution of diphenyl benzyloxycarbonylaminoisopropylmethanephosphonate (10 mg, 23  $\mu\text{mol}$ ) in MeOH (1 mL) was added 10% Pd/C (1 mg, 0.9  $\mu\text{mol}$ ) and the resulting suspension stirred for 2 h under an atmosphere of  $\text{H}_2$ . The mixture was filtered through a syringe filter (0.22  $\mu\text{m}$ ), reduced *in vacuo*, and redissolved in dry MeCN (1 mL). To this solution was added sulfonated Cy5 carboxylic acid (5 mg, 8  $\mu\text{mol}$ ), PyBOP (5 mg, 9  $\mu\text{mol}$ ) and  $\text{Et}_3\text{N}$  (50  $\mu\text{L}$ , 71  $\mu\text{mol}$ ). After stirring for 5 h at room temperature, the reaction mixture was purified by preparative HPLC (0–70% MeCN in  $\text{H}_2\text{O}$  with 1% TFA throughout) to provide Cy5-V-DPP (2.1 mg, 30%) as a blue solid after lyophilization. LC-MS:  $m/z$  942.6  $[\text{M}-2\text{H}]^-$ . Analytical HPLC (method B): retention time 6.61 min, purity > 95%. HRMS:  $m/z$  calc'd for  $[\text{M}]^+$ ,  $\text{M} = \text{C}_{49}\text{H}_{59}\text{N}_3\text{O}_{10}\text{PS}_2$ : 944.3374, found: 944.3385.

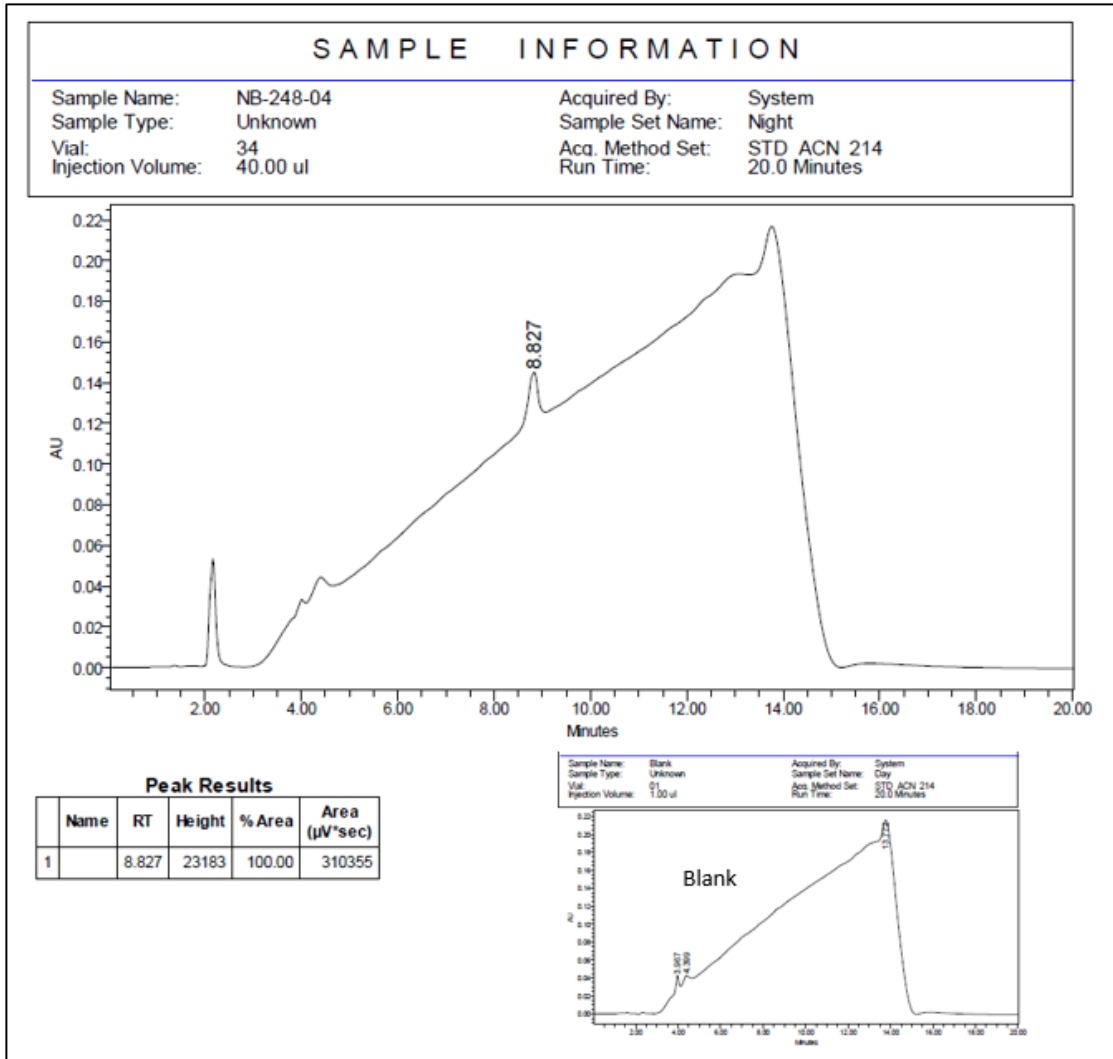

**Supplemental Figure 1.** Analytical HPLC of Cy5-PK-DPP.

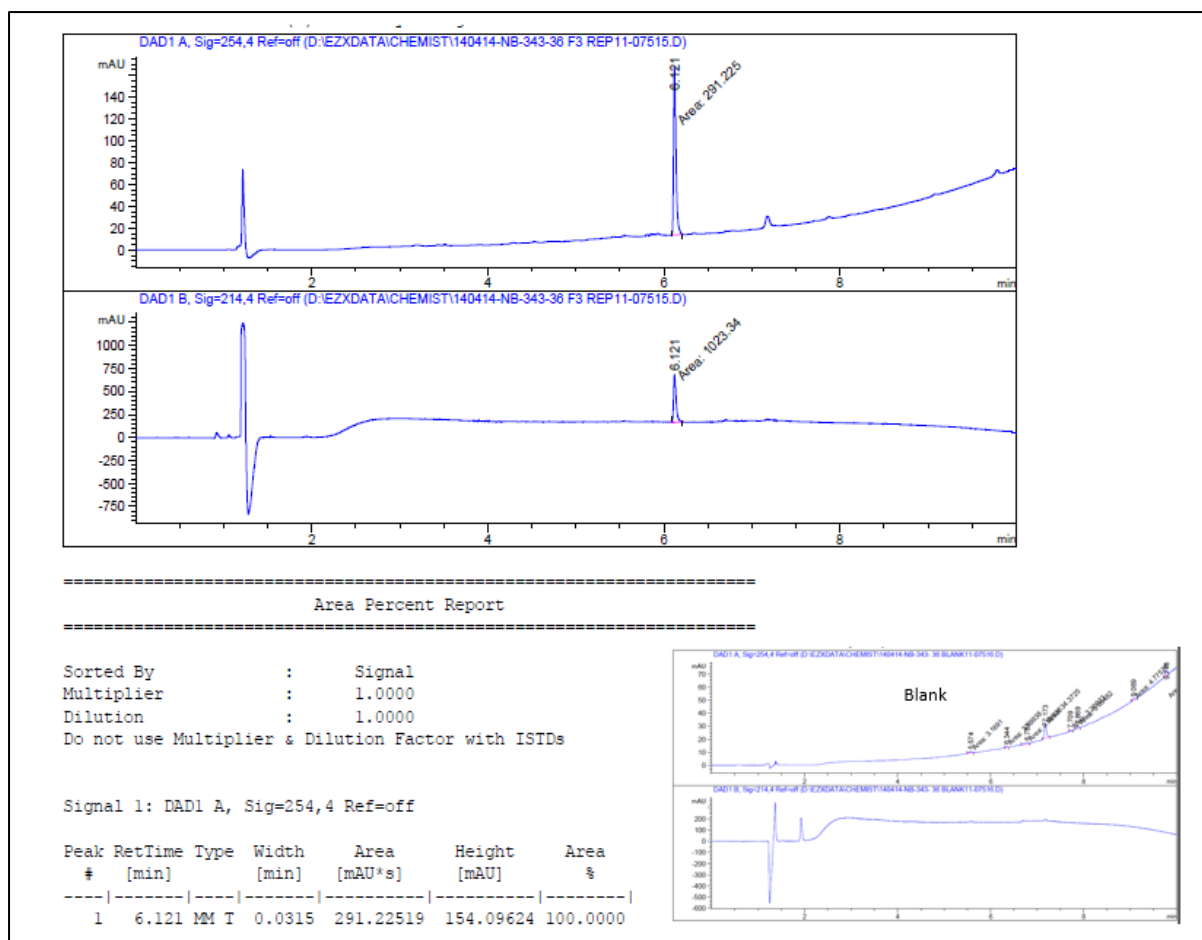

**Supplemental Figure 2.** Analytical HPLC of Cy5-V-DPP.
